# Supplementary material for: Cyclin-dependent kinases
Source: Springer Nature journal article supplement (doi:10.1186/gb4184), 2014-06-30
Supplement: 13059_2014_3276_MOESM1_ESM.pdf [file 13059_2014_3276_MOESM1_ESM.pdf]

## Cell cycle-related (Multiple cyclins)

### S. cerevisiae

### Human

Cdks

Cdks

Cyclins

Cdc28

Cdk1  
Cdk2  
Cdk3

CycA  
CycB  
CycE  
CycC?

Cdk4  
Cdk6

CycD

Pho85

Cdk5  
Cdk14  
Cdk15  
Cdk16  
Cdk17  
Cdk18

Cdk5R1  
Cdk5R2  
CycD  
CycY

## Transcriptional (Single cyclins)

### S. cerevisiae

### Human

Cdks

Cdks

Cyclins

Kin28

Cdk7  
Cdk20

CycH  
CycH

Srb10

Cdk8  
Cdk19

CycC

Bur1

Cdk9

CycT

Ctk1

Cdk12  
Cdk13

CycK
