# Supplementary material for: Cyclin-dependent kinases
Source: Springer Nature journal article supplement (doi:10.1186/gb4184), 2014-06-30

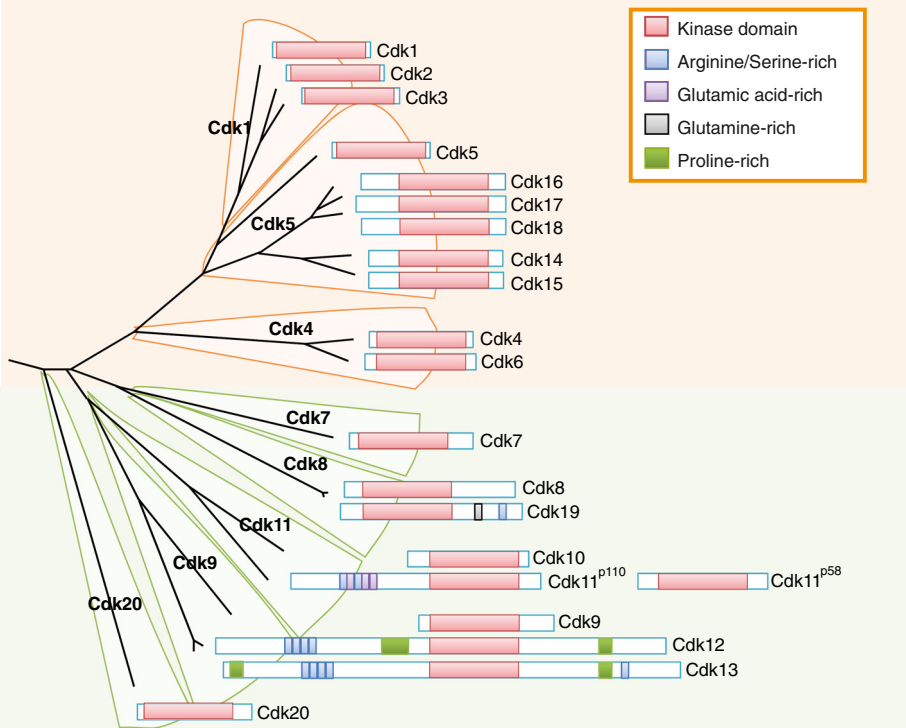

Supplement: 13059_2014_3276_MOESM2_ESM.pdf [file 13059_2014_3276_MOESM2_ESM.pdf]
